# Supplementary material for: A Novel Approach: Investigating the Intracellular Clearance Mechanism of Glyceraldehyde-Derived Advanced Glycation End-Products Using the Artificial Checkpoint Kinase 1 d270KD Mutant as a Substrate Model
Source: MDPI journal article supplement (doi:10.3390/cells12242838), 2023-12-14
Supplement: s1 [file s1]

### Supplementary Figure S1

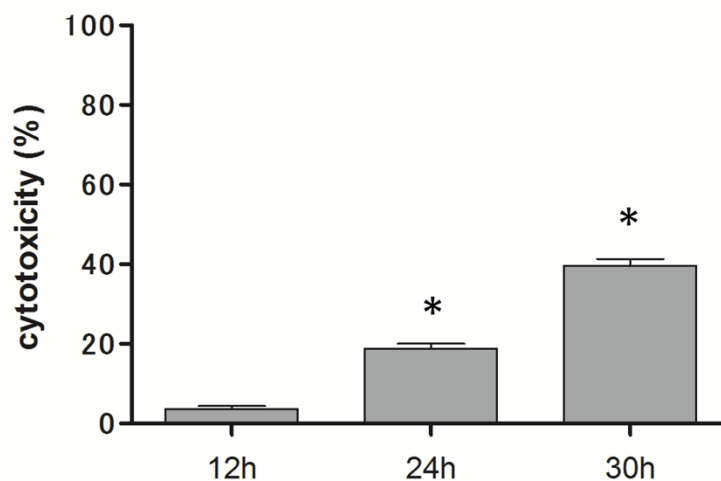

**Figure S1.** Lactate dehydrogenase (LDH) cytotoxicity assay. LDH levels in culture supernatants of HeLa cells treated with 2 mM GA. Data are representative of four independent experiments. Means  $\pm$  SEM are shown. \* $p < 0.001$  using one-way ANOVA with Dunnett's multiple comparisons.

## Supplementary Figure S2

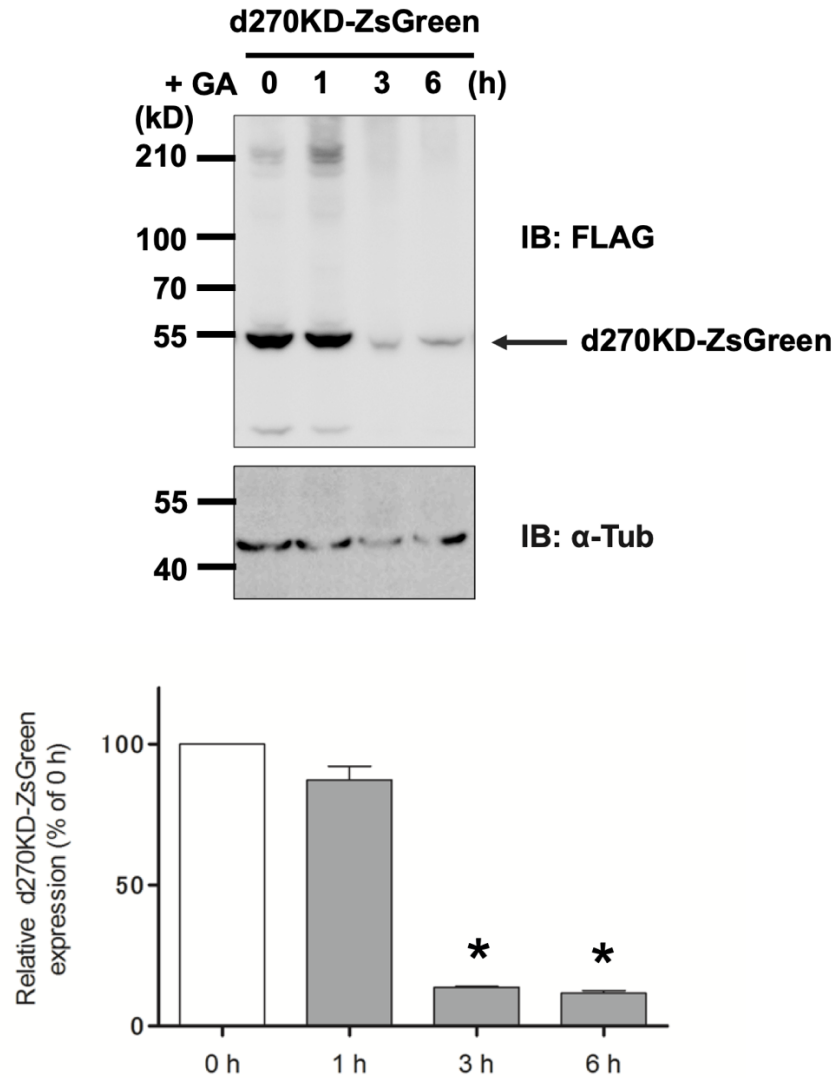

**Figure S2.** GA-stimulated rapid intracellular degradation of d270KD fusion proteins to ZsGreen1. The expression vector of d270KD fusion EGFP (d270KD-ZsGreen) was transfected into HeLa cells and stimulated with 2 mM GA 48 h later. Cell lysates were collected at the indicated times and subjected to a Western blot analysis. Densitometric quantification of d270KD-ZsGreen values relative to non-treatment group (0 h) are shown. Data were analyzed using one-way ANOVA followed by Dunnett's *post hoc* test and shown as mean values  $\pm$  SEM of three independent experiments. \* $p < 0.001$ .

### Supplementary Figure S3

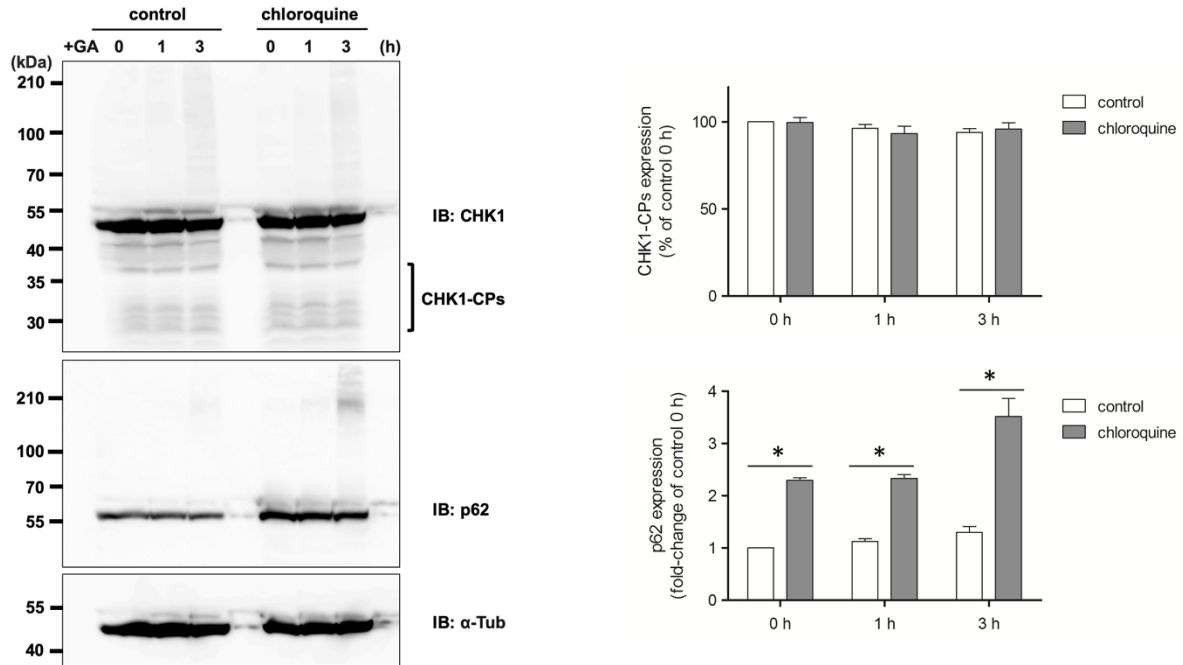

**Figure S3.** Effects of chloroquine on the GA-stimulated degradation of endogenous CHK1-CPs. HeLa cells were stimulated with 50  $\mu$ M chloroquine for 20 h. Cells were collected after the stimulation with 2 mM GA for the indicated times. The resulting cell lysates were subjected to a Western blot analysis with the indicated antibodies. The densitometric quantification of CHK1 and total p62 values relative to the non-treatment control group (control 0 h) are shown. Data were analyzed using a two-way ANOVA followed by Bonferroni's *post hoc* test and shown as the mean values  $\pm$  SEM of three independent experiments.  $*p < 0.001$ .
